# Supplementary material for: Impact and sustainability of centralising acute stroke services in English metropolitan areas: retrospective analysis of hospital episode statistics and stroke national audit data
Source: PubMed Central journal article supplement (PMC6334718; doi:10.1136/bmj.l1), 2019-01-23

## Supplementary material

Table A. Characteristics of patients before and after centralisation of acute stroke services in Greater Manchester, London and the rest of England

Table B. Patient characteristics in analysis of clinical interventions, by region and year (characteristics from Ramsay et al [2015] included for comparison)

Table C. Unadjusted proportions of patients receiving clinical indicators in Greater Manchester by year

Table D. Unadjusted proportions of patients receiving clinical interventions in London by year

Table E. Unadjusted proportions of patients receiving clinical interventions in Rest of England by year

Figure A. Adjusted likelihood of patients receiving evidence-based clinical interventions in Greater Manchester

Figure B. Adjusted likelihood of patients receiving evidence-based clinical interventions in London

Figure C. Adjusted likelihood of patients receiving evidence-based clinical interventions in London

**Table A. Characteristics of patients before and after centralisation of acute stroke services in Greater Manchester, London and the rest of England**

|                                                        | Rest of England            |                          |                          | Greater Manchester         |                          |                          |                                                 |                                             | London                    |                         |
|--------------------------------------------------------|----------------------------|--------------------------|--------------------------|----------------------------|--------------------------|--------------------------|-------------------------------------------------|---------------------------------------------|---------------------------|-------------------------|
|                                                        | January 2008 to March 2010 | April 2010 to March 2015 | April 2015 to March 2016 | January 2008 to March 2010 | April 2010 to March 2015 | April 2015 to March 2016 | April 2015 to March 2016, not treated in a HASU | April 2015 to March 2016, treated in a HASU | January 2008 to June 2010 | July 2010 to March 2016 |
| No. patients                                           | 109 795                    | 247 046                  | 48 443                   | 9412                       | 20 390                   | 4249                     | 1400                                            | 2849                                        | 18 654                    | 51 193                  |
| Age, mean (years)                                      | 75.7                       | 75.4                     | 75.0                     | 74.3                       | 73.8                     | 73.6                     | 75.2                                            | 72.8                                        | 73.1                      | 72.8                    |
| Female (%)                                             | 53.1                       | 51.7                     | 49.7                     | 52.6                       | 50.7                     | 50.0                     | 50.2                                            | 49.9                                        | 51.0                      | 49.0                    |
| White British ethnic group (%)                         | 84.1                       | 85.8                     | 82.8                     | 82.9                       | 84.0                     | 81.9                     | 79.3                                            | 83.2                                        | 58.5                      | 53.0                    |
| Intracerebral hemorrhage (%)†                          | 13.3                       | 13.3                     | 14.2                     | 11.9                       | 12.1                     | 12.3                     | 13.1                                            | 11.9                                        | 16.4                      | 17.1                    |
| Cerebral infarction (%)‡                               | 65.1                       | 75.3                     | 78.9                     | 61.9                       | 68.7                     | 80.1                     | 71.8                                            | 85.2                                        | 69.4                      | 77.1                    |
| Stroke, not specified as hemorrhage or infarction (%)§ | 22.5                       | 12.3                     | 7.9                      | 26.9                       | 19.9                     | 7.5                      | 15.8                                            | 3.4                                         | 15.5                      | 7.7                     |
| Comorbidities, mean (number)                           | 4.7                        | 5.9                      | 6.5                      | 5.3                        | 6.6                      | 6.9                      | 7.8                                             | 6.5                                         | 5.1                       | 6.3                     |
| Most deprived quintile (%)¶                            | 24.6                       | 23.8                     | 23.2                     | 41.2                       | 39.2                     | 37.2                     | 36.8                                            | 37.4                                        | 23.2                      | 24.4                    |

† Primary diagnosis of stroke with ICD-10 diagnostic code I61.

‡ Primary diagnosis of stroke with ICD-10 diagnostic code I63.

§ Primary diagnosis of stroke with ICD-10 diagnostic code I64.

¶ Based on 32 482 Lower Layer Super Output Areas of residence in England.

**Table B. Patient characteristics in analysis of clinical indicators, by region and year**

|                                    | Greater Manchester |         |         |         | London |         |         |         | Rest of England |         |         |         |
|------------------------------------|--------------------|---------|---------|---------|--------|---------|---------|---------|-----------------|---------|---------|---------|
|                                    | Ramsay             | 2013/14 | 2014/15 | 2015/16 | Ramsay | 2013/14 | 2014/15 | 2015/16 | Ramsay          | 2013/14 | 2014/15 | 2015/16 |
| <b>Observations</b>                | 10,295             | 3,877   | 3,729   | 4,480   | 16,533 | 8,131   | 8,150   | 8,000   | 9,044           | 55,262  | 62,824  | 63,667  |
| <b>Age</b>                         |                    |         |         |         |        |         |         |         |                 |         |         |         |
| Mean age (yr)                      | 73.2               | 73.5    | 73.7    | 73.5    | 72.7   | 72.4    | 72.5    | 72.5    | 73.6            | 75.3    | 75.2    | 75.2    |
| Aged over 75yr (N)                 |                    | 2,077   | 2,041   | 2,401   |        | 4,276   | 4,257   | 4,182   |                 | 32960   | 37285   | 37478   |
| Aged over 75yr (%)                 | 50                 | 53.57   | 54.73   | 53.59   | 50     | 52.59   | 52.23   | 52.28   | 51              | 59.6    | 59.4    | 58.9    |
| <b>Sex</b>                         |                    |         |         |         |        |         |         |         |                 |         |         |         |
| Female (N)                         |                    | 1,974   | 1,819   | 2,208   |        | 3,969   | 3,905   | 3,832   |                 | 28,009  | 31,628  | 31,552  |
| Female (%)                         | 51                 | 50.92   | 48.78   | 49.29   | 49     | 48.81   | 47.91   | 47.9    | 51              | 50.7    | 50.3    | 49.6    |
| <b>Stroke type</b>                 |                    |         |         |         |        |         |         |         |                 |         |         |         |
| Primary infarction (N)             |                    | 3393    | 3277    | 3946    |        | 6970    | 7063    | 6862    |                 | 48734   | 55072   | 55476   |
| Primary infarction (%)             | 87                 | 88.38   | 88.57   | 88.46   | 86     | 88.15   | 87.97   | 86.73   | 89              | 89.4    | 88.5    | 87.8    |
| Haemorrhagic (N)                   |                    | 446     | 423     | 515     |        | 937     | 966     | 1050    |                 | 5772    | 7174    | 7732    |
| Haemorrhagic (%)                   | 13                 | 11.62   | 11.43   | 11.54   | 14     | 11.85   | 12.03   | 13.27   | 11              | 10.6    | 11.5    | 12.2    |
| <b>Where stroke happened</b>       |                    |         |         |         |        |         |         |         |                 |         |         |         |
| Admitted from outside hospital (N) |                    | 3,608   | 3,485   | 4,195   |        | 7,792   | 7,799   | 7,671   |                 | 52,236  | 59,269  | 60,168  |
| Admitted from outside hospital (%) | 90                 | 93.06   | 93.46   | 93.64   | 95     | 95.83   | 95.69   | 95.89   | 94              | 94.5    | 94.3    | 94.5    |
| <b>Treatment in HASU</b>           |                    |         |         |         |        |         |         |         |                 |         |         |         |
| Total treated in HASU (N)          |                    | 2,205   | 2,389   | 3,849   |        | 7,713   | 7,668   | 7,522   | -               | -       | -       | -       |
| Total treated in HASU (%)          | 39                 | 56.9    | 64.1    | 85.9    | 93     | 94.9    | 94.1    | 94.0    | -               | -       | -       | -       |

|                                      | Greater Manchester |         |         |         | London |         |         |         | Rest of England |         |         |         |
|--------------------------------------|--------------------|---------|---------|---------|--------|---------|---------|---------|-----------------|---------|---------|---------|
|                                      | Ramsay             | 2013/14 | 2014/15 | 2015/16 | Ramsay | 2013/14 | 2014/15 | 2015/16 | Ramsay          | 2013/14 | 2014/15 | 2015/16 |
| Reaching hospital in ≤4h (N)         |                    | 1,254   | 1,156   | 1,322   |        | 3,060   | 3,203   | 3,162   | -               | 21,515  | 24,381  | 24,248  |
| Reaching hospital in ≤4h (%)         |                    | 61.0    | 59.2    | 53.8    |        | 59.3    | 59.8    | 59.1    | -               | 64.0    | 62.8    | 60.8    |
| Reaching hospital in ≤48h (N)        |                    | 1,175   | 1,077   | 1,435   |        | 2,521   | 2,190   | 2,082   |                 | 17,318  | 20,050  | 19,452  |
| Reaching hospital in ≤48h (%)        |                    | 98.4    | 98.3    | 97.8    |        | 97.8    | 97.7    | 97.8    |                 | 97.7    | 97.9    | 98.1    |
| Treated in HASU if arrive in ≤4h (N) |                    | 991     | 982     | 1,246   |        | 2,999   | 3,147   | 3,111   | -               | -       | -       | -       |
| Treated in HASU if arrive in ≤4h (%) | 67                 | 79.0    | 85.0    | 94.3    | 96     | 98.0    | 98.3    | 98.4    | -               | -       | -       | -       |
| <b>Thrombolysis</b>                  |                    |         |         |         |        |         |         |         |                 |         |         |         |
| Infarct pts classed as eligible (N)  |                    | 420     | 297     | 382     |        | 1432    | 1344    | 1284    |                 | 7889    | 8103    | 7573    |
| Infarct pts classed as eligible (%)  |                    | 12.4    | 9.1     | 9.7     |        | 20.5    | 19.0    | 18.7    |                 | 16.2    | 14.7    | 13.7    |
| Infarct pts receiving tPA (N)        |                    | 274     | 244     | 337     |        | 1331    | 1267    | 1134    |                 | 6145    | 7138    | 6986    |
| Total receiving tPA (% infarct pts)  |                    | 8.1     | 7.4     | 8.5     |        | 19.1    | 17.9    | 16.5    |                 | 12.6    | 13.0    | 12.6    |
| Total receiving tPA (% eligible pts) |                    | 65.2    | 82.2    | 88.2    |        | 93.0    | 94.3    | 88.3    |                 | 77.9    | 88.1    | 92.3    |
| <b>Worst level of consciousness</b>  |                    |         |         |         |        |         |         |         |                 |         |         |         |
| Alert (N)                            |                    | 3,230   | 3,078   | 3,814   |        | 6,829   | 6,755   | 6,713   |                 | 45,988  | 52,317  | 53,309  |
| Alert (%)                            | 74                 | 83.31   | 82.54   | 85.13   | 78     | 83.99   | 82.88   | 83.91   | 75              | 83.2    | 83.3    | 83.7    |
| Verbally arousable (N)               |                    | 331     | 349     | 396     |        | 795     | 825     | 768     |                 | 5,374   | 6,108   | 6,068   |
| Verbally arousable (%)               | 15                 | 8.54    | 9.36    | 8.84    | 15     | 9.78    | 10.12   | 9.6     | 11              | 9.7     | 9.7     | 9.5     |
| Not alert (N)                        |                    | 181     | 195     | 166     |        | 317     | 379     | 338     |                 | 2,183   | 2,585   | 2,490   |
| Not alert (%)                        | 4                  | 4.67    | 5.23    | 3.71    | 3      | 3.9     | 4.65    | 4.23    | 9               | 4.0     | 4.1     | 3.9     |
| Totally unresponsive (N)             |                    | 135     | 107     | 104     |        | 190     | 191     | 181     |                 | 1,717   | 1,814   | 1,800   |
| Totally unresponsive (%)             | 7                  | 3.48    | 2.87    | 2.32    | 4      | 2.34    | 2.34    | 2.26    | 12              | 3.1     | 2.9     | 2.8     |

'Ramsay' refers to the patient characteristics for the post-centralization sample covering the period 2010-2012 reported in Ramsay et al [9]. Patients classified as treated in HASU if treated in HASU at any point in care. Comparator area covered far more of rest of England than in Ramsay et al [9]. HASU= hyperacute stroke unit; yr = year; h = hour; tPA=tissue plasminogen activator; N = number of observations.

**Table C. Unadjusted proportions of patients receiving clinical interventions in Greater Manchester by year**

| Intervention               | Ramsay 2015      | 2013/2014         | 2014/2015         | 2015/2016         |
|----------------------------|------------------|-------------------|-------------------|-------------------|
| Scan 60 mins               |                  | 1490/3839 (38.8%) | 1758/3700 (47.5%) | 2627/4461 (58.9%) |
| Scan 180 mins              | 5785/10295 (56%) | 2803/3839 (73.0%) | 2998/3700 (81.0%) | 3822/4461 (85.7%) |
| Scan 24h                   | 8814/9563 (92%)  | 3642/3839 (94.9%) | 3587/3700 (97.0%) | 4340/4461 (97.3%) |
| tPA to eligible patients   |                  | 274/420 (65.2%)   | 244/297 (82.2%)   | 337/382 (88.2%)   |
| tPA within 60 mins         |                  | 197/274 (71.9%)   | 165/244 (67.6%)   | 243/337 (72.1%)   |
| Swallow screen in 4h       |                  | 2050/3544 (57.8%) | 2128/3399 (62.6%) | 2843/4145 (68.6%) |
| SU within 4h               | 4982/10295 (48%) | 2414/3870 (62.4%) | 2347/3724 (63.0%) | 3232/4470 (72.3%) |
| Consultant assessment 14h  |                  | 1978/3428 (57.7%) | 1977/3346 (59.1%) | 3356/4234 (79.3%) |
| Consultant assessment 24h  |                  | 2650/3428 (77.3%) | 2654/3346 (79.3%) | 3925/4234 (92.7%) |
| Nurse assessment 12h       |                  | 3136/3664 (85.6%) | 3057/3562 (85.8%) | 3917/4320 (90.7%) |
| Nurse assessment 24h       |                  | 3409/3664 (93.0%) | 3289/3562 (92.3%) | 4073/4320 (94.3%) |
| Physio assessment 24h      |                  | 1927/3498 (55.1%) | 2141/3415 (62.7%) | 3342/4155 (80.4%) |
| Physio assessment 72h      | 8030/8867 (91%)  | 3315/3498 (94.8%) | 3308/3415 (96.9%) | 4047/4155 (97.4%) |
| Occupational therapist 24h |                  | 1720/3460 (49.7%) | 2059/3419 (60.2%) | 3308/4199 (78.8%) |
| Occupational therapist 72h |                  | 3255/3460 (94.1%) | 3290/3419 (96.2%) | 4063/4199 (96.8%) |
| SaLT swallow 24h           |                  | 848/1611 (52.6%)  | 853/1516 (56.3%)  | 805/1471 (54.7%)  |
| SaLT swallow 72h           | 8521/9388 (91%)  | 1349/1611 (83.7%) | 1374/1516 (90.6%) | 1342/1471 (91.2%) |
| SaLT communication 24h     |                  | 591/1559 (37.9%)  | 907/1738 (52.2%)  | 1579/2310 (68.4%) |
| SaLT communication 72h     |                  | 1328/1559 (85.2%) | 1611/1738 (92.7%) | 2222/2310 (96.2%) |

'Ramsay' refers to the patient characteristics for the post-centralization sample covering the period 2010-2012 reported in Ramsay et al [9].

**Table D. Unadjusted proportions of patients receiving clinical interventions in London by year**

| Intervention               | Ramsay            | 2013/2014         | 2014/2015         | 2015/2016         |
|----------------------------|-------------------|-------------------|-------------------|-------------------|
| Scan 60 mins               |                   | 4524/7907 (57.2%) | 4733/8029 (59.0%) | 4738/7912 (59.9%) |
| Scan 180 mins              | 11614/16553 (70%) | 6324/7907 (80.0%) | 6571/8029 (81.8%) | 6508/7912 (82.3%) |
| Scan 24h                   | 14895/15679 (95%) | 7695/7907 (97.3%) | 7805/8029 (97.2%) | 7709/7912 (97.4%) |
| tPA to eligible patients   |                   | 1331/1432 (93.0%) | 1267/1344 (94.3%) | 1134/1284 (88.3%) |
| tPA within 60 mins         |                   | 1104/1331 (83.0%) | 1059/1267 (83.6%) | 915/1134 (80.7%)  |
| Swallow screen in 4h       |                   | 5068/7718 (65.7%) | 5220/7645 (68.3%) | 5369/7606 (70.6%) |
| SU within 4h               | 11360/16553 (69%) | 4993/8112 (61.6%) | 4861/8121 (59.9%) | 4806/7973 (60.3%) |
| Consultant assessment 14h  |                   | 3932/7821 (50.3%) | 4197/7873 (53.3%) | 3906/7662 (51.0%) |
| Consultant assessment 24h  |                   | 7014/7821 (89.7%) | 7118/7873 (90.4%) | 6797/7662 (88.7%) |
| Nurse assessment 12h       |                   | 7078/7767 (91.1%) | 7259/7810 (92.9%) | 7178/7678 (93.5%) |
| Nurse assessment 24h       |                   | 7443/7767 (95.8%) | 7485/7810 (95.8%) | 7398/7678 (96.4%) |
| Physio assessment 24h      |                   | 4062/7064 (57.5%) | 4315/7001 (61.6%) | 4498/6970 (64.5%) |
| Physio assessment 72h      | 14190/14760 (96%) | 6712/7064 (95.0%) | 6753/7002 (96.4%) | 6670/6970 (95.7%) |
| Occupational therapist 24h |                   | 3386/6766 (50.0%) | 3871/6840 (56.6%) | 4179/6856 (61.0%) |
| Occupational therapist 72h |                   | 6161/6766 (91.1%) | 6464/6840 (94.5%) | 6443/6856 (94.0%) |
| SaLT swallow 24h           |                   | 1798/3279 (54.8%) | 1857/3403 (54.6%) | 1600/3104 (51.6%) |
| SaLT swallow 72h           | 15431/15684 (98%) | 2924/3279 (89.2%) | 3114/3403 (91.5%) | 2728/3104 (87.9%) |
| SaLT communication 24h     |                   | 2269/4933 (46.0%) | 2343/4755 (49.3%) | 2308/4640 (49.7%) |
| SaLT communication 72h     |                   | 4411/4933 (89.4%) | 4410/4755 (92.7%) | 4204/4641 (90.6%) |

'Ramsay' refers to the patient characteristics for the post-centralization sample covering the period 2010-2012 reported in Ramsay et al [9]. h=hour; SaLT=Speech and Language Therapist; tPA=tissue plasminogen activator.

**Table E. Unadjusted proportions of patients receiving clinical interventions in Rest of England by year**

| Intervention               | 2013/2014           | 2014/2015           | 2015/2016           |
|----------------------------|---------------------|---------------------|---------------------|
| Scan 60 mins               | 22462/54506 (41.2%) | 26801/62246 (43.1%) | 29160/63208 (46.1%) |
| Scan 180 mins              | 38036/54506 (69.8%) | 45452/62246 (73.0%) | 48277/63208 (76.4%) |
| Scan 24h                   | 51592/54506 (94.7%) | 59642/62246 (95.8%) | 61054/63208 (96.6%) |
| tPA to eligible patients   | 6145/7889 (77.9%)   | 7138/8103 (88.1%)   | 6986/7573 (92.3%)   |
| tPA within 60 mins         | 2938/6145 (47.8%)   | 3739/7138 (52.4%)   | 3901/6986 (55.8%)   |
| Swallow screen in 4h       | 30570/51864 (58.9%) | 37564/59396 (63.2%) | 40643/60458 (67.2%) |
| SU within 4h               | 33057/55069 (60.0%) | 36585/62605 (58.4%) | 37599/63441 (59.3%) |
| Consultant assessment 14h  | 25968/50422 (51.5%) | 30354/57600 (52.7%) | 31758/59179 (53.7%) |
| Consultant assessment 24h  | 40379/50422 (80.1%) | 47114/57600 (81.8%) | 49576/59179 (83.8%) |
| Nurse assessment 12h       | 44033/51244 (85.9%) | 51042/58378 (87.4%) | 52874/59613 (88.7%) |
| Nurse assessment 24h       | 47616/51244 (92.9%) | 54651/58378 (93.6%) | 56214/59613 (94.3%) |
| Physio assessment 24h      | 26988/48588 (55.5%) | 31076/54942 (56.6%) | 33301/56297 (59.2%) |
| Physio assessment 72h      | 45375/48589 (93.4%) | 51115/54943 (93.0%) | 52621/56297 (93.5%) |
| Occupational therapist 24h | 20314/45341 (44.8%) | 24265/52170 (46.5%) | 27830/54192 (51.4%) |
| Occupational therapist 72h | 39408/45341 (86.9%) | 45731/52171 (87.7%) | 48304/54194 (89.1%) |
| SaLT swallow 24h           | 11245/23586 (47.7%) | 12416/25219 (49.2%) | 13535/24983 (54.2%) |
| SaLT swallow 72h           | 18199/23588 (77.2%) | 20405/25220 (80.9%) | 21103/24983 (84.5%) |
| SaLT communication 24h     | 7997/23674 (33.8%)  | 9620/26621 (36.1%)  | 11196/27529 (40.7%) |
| SaLT communication 72h     | 18049/23674 (76.2%) | 21207/26621 (79.7%) | 23148/27529 (84.1%) |

Ramsay et al [9] did not use Rest of England as a comparator. h=hour; SaLT=Speech and Language Therapist; tPA=tissue plasminogen activator.



**Figure A. Adjusted likelihood of patients receiving evidence-based clinical interventions in Greater Manchester**

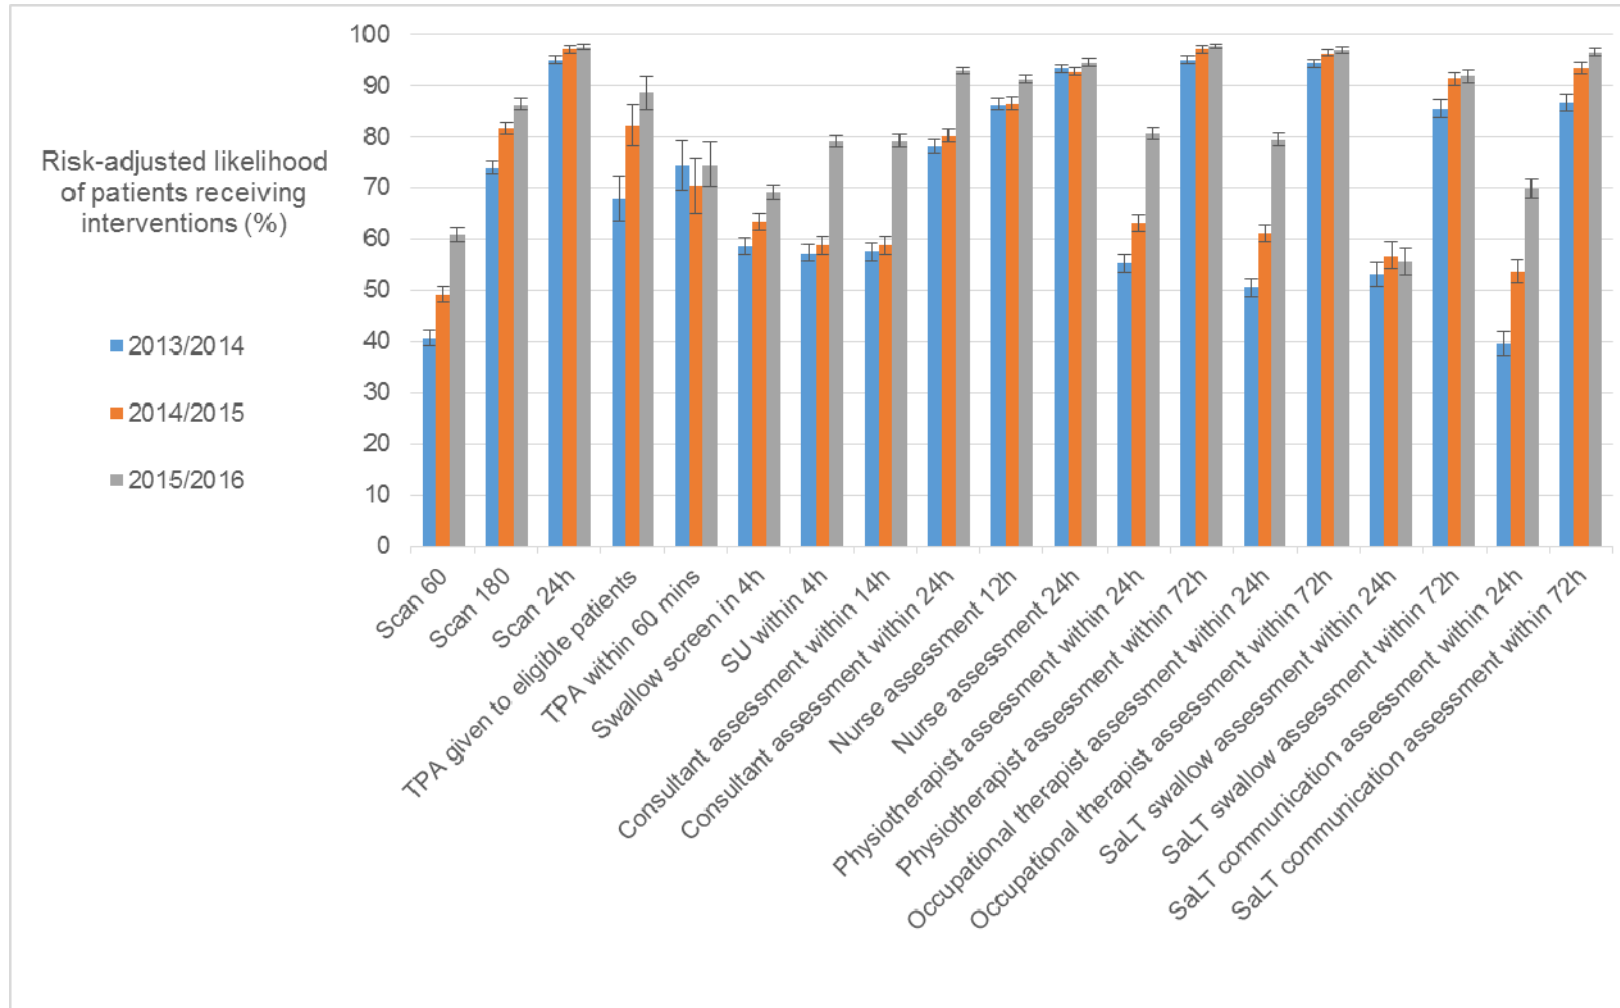

Figure B. Adjusted likelihood of patients receiving evidence-based clinical interventions in London

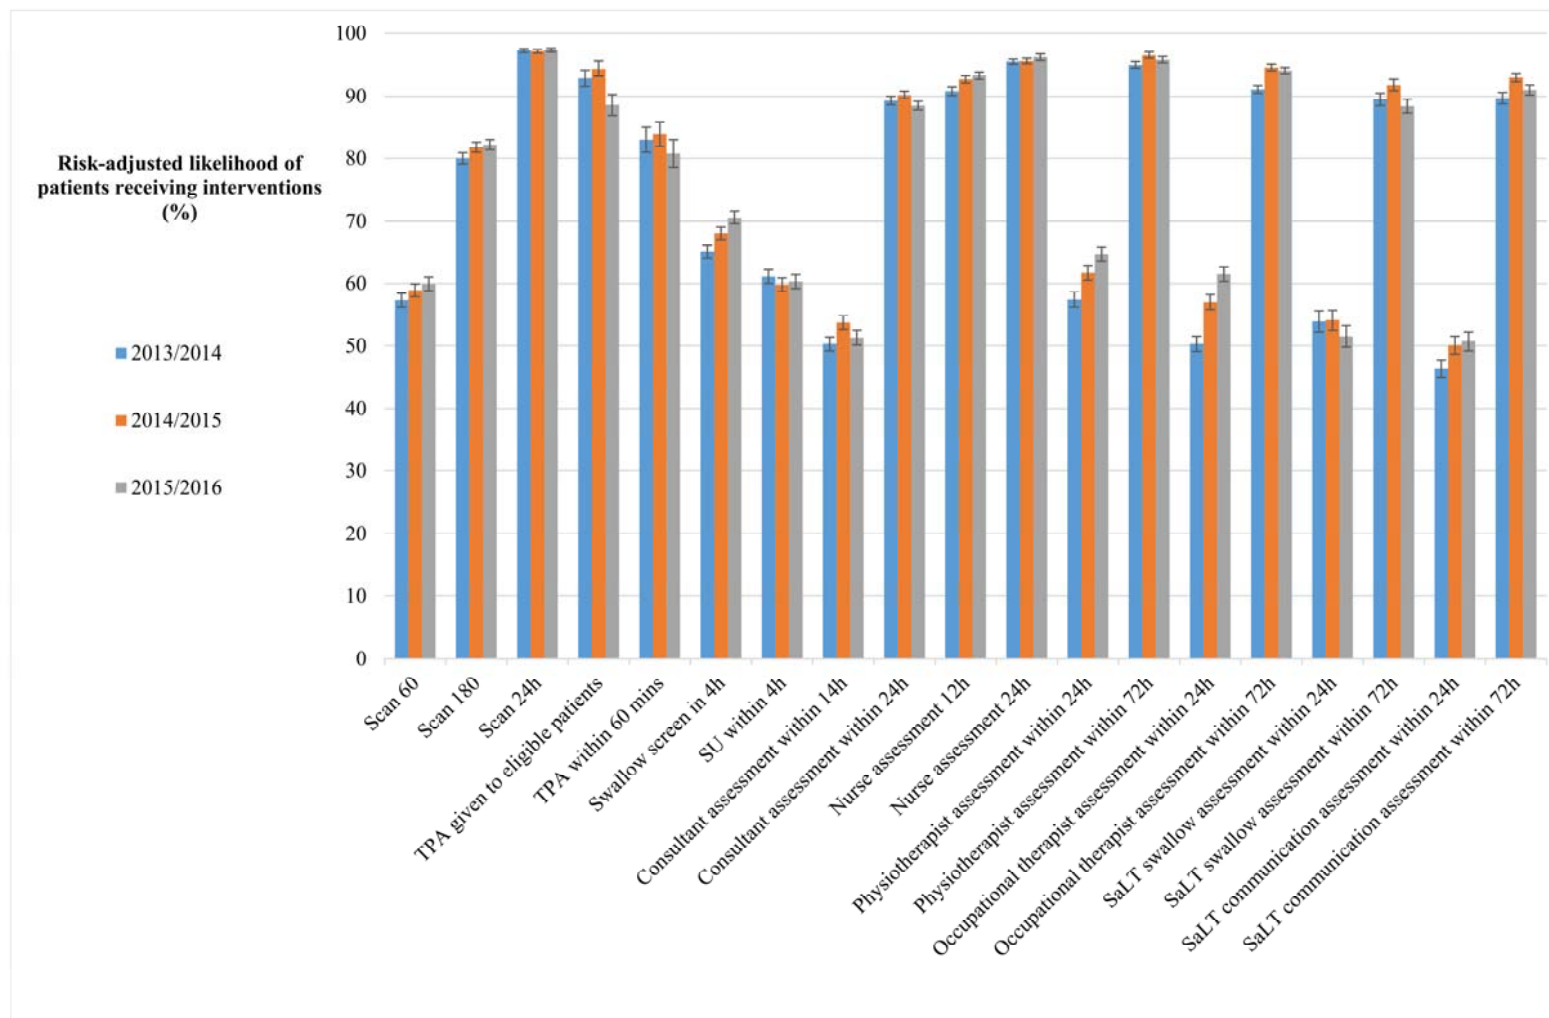

**Figure C. Adjusted likelihood of patients receiving evidence-based clinical interventions in Rest of England**

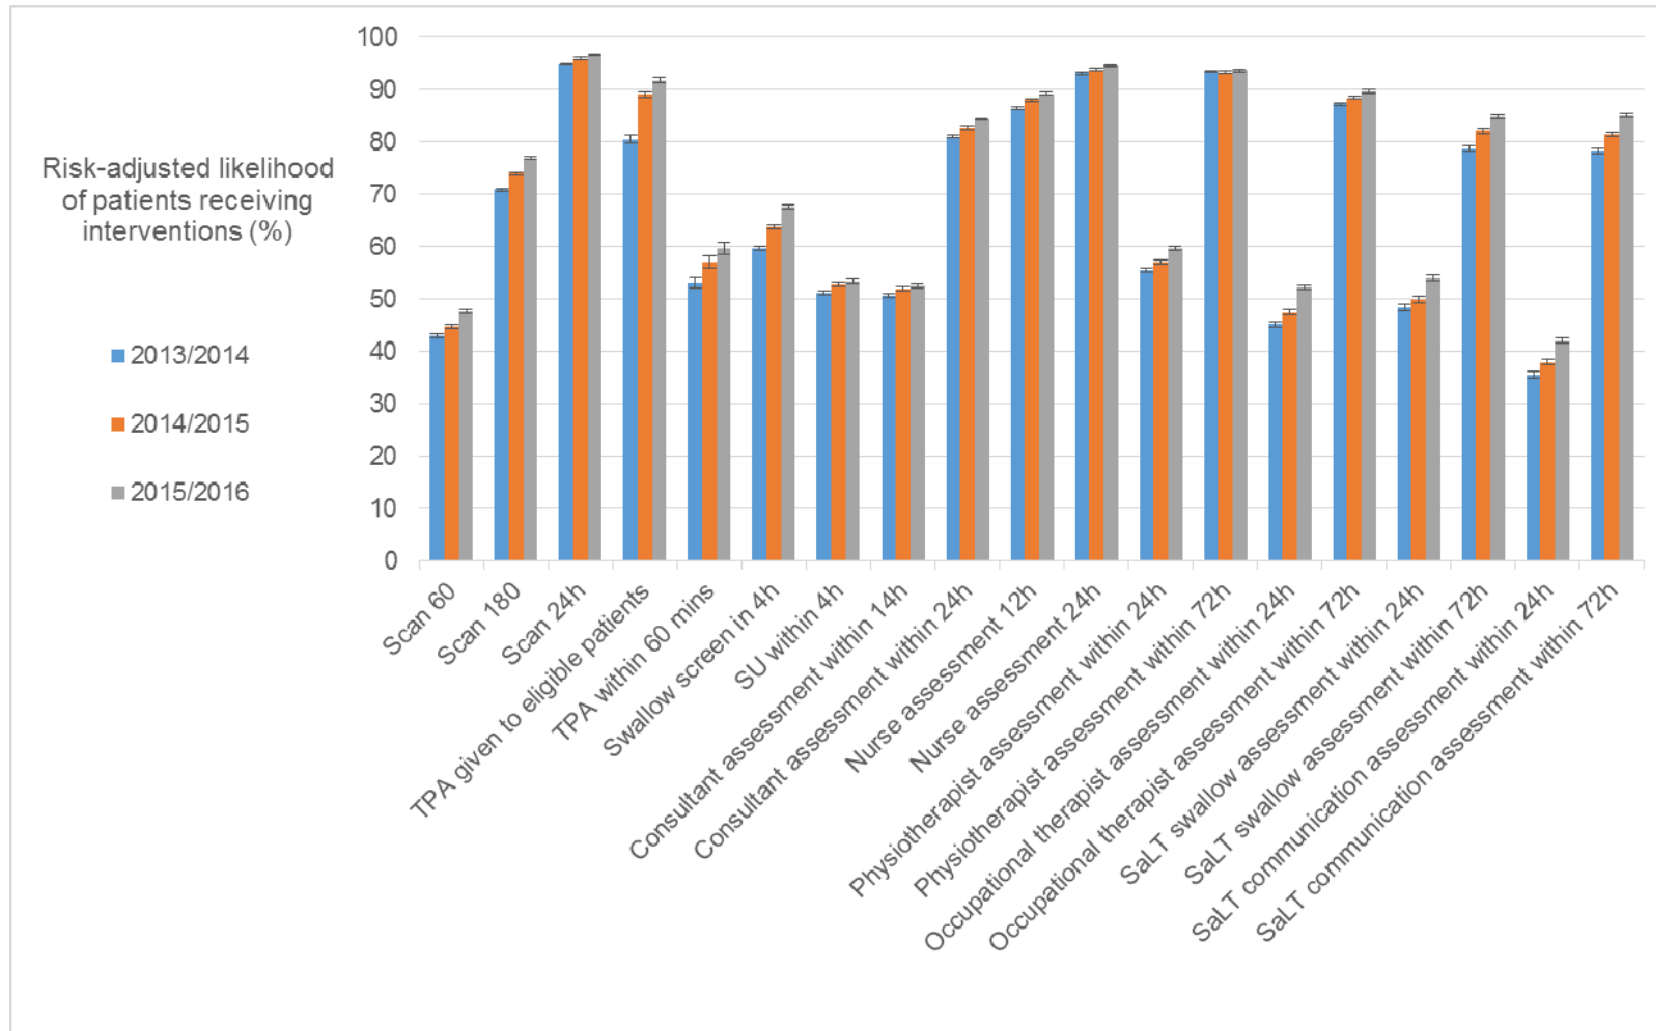

Supplement: mors046272.ww1.pdf [file mors046272.ww1.pdf]
